# Supplementary material
Source: PubMed Central journal article supplement (PMC3011022)
Supplement: NIHMS241808-supplement-Siri-Tarino_Supplementary_Table_S1.pdf [file NIHMS241808-supplement-Siri-Tarino_Supplementary_Table_S1.pdf]

Supplementary Table S1. Anthropometric, biochemical and metabolic profiles before and after a weight loss intervention for men achieving the pre-designated study goal of BMI < 25

|                          |          | A→A (n=30)                 | B→A (n=30)                 | B→B (n=7)                | p-value |
|--------------------------|----------|----------------------------|----------------------------|--------------------------|---------|
| Weight (kg)              | Baseline | 83.1 ± 7.6                 | 83.8 ± 8.7                 | 80.0 ± 8.2               | NS      |
|                          | End      | 74.2 ± 6.5                 | 74.3 ± 7.6                 | 71.8 ± 6.9               | NS      |
|                          | % Change | -10.7 ± 2.3                | -11.3 ± 1.7                | -10.2 ± 3.0              | NS      |
| BMI (kg/m <sup>2</sup> ) | Baseline | 26.5 ± 1.0                 | 26.9 ± 1.0                 | 26.5 ± 0.9               | NS      |
|                          | End      | 23.7 ± 0.7                 | 23.8 ± 0.8                 | 23.8 ± 0.7               | NS      |
|                          | % Change | -10.7 ± 2.3                | -11.3 ± 1.7                | -10.1 ± 3.0              | NS      |
| Waist (cm)               | Baseline | 94.1 ± 6.2                 | 95.9 ± 6.0                 | 93.6 ± 4.8               | NS      |
|                          | End      | 86.3 ± 5.26                | 85.9 ± 6.07                | 86.6 ± 3.27              | NS      |
|                          | % Change | -8.2 ± 3.6 <sup>a</sup>    | -10.4 ± 3.5 <sup>a</sup>   | -7.4 ± 3.2 <sup>a</sup>  | 0.03    |
| % Body fat               | Baseline | 24.0 ± 3.6                 | 24.2 ± 3.8                 | 24.3 ± 1.3               | NS      |
|                          | End      | 19.8 ± 4.24                | 19.6 ± 3.37                | 21.6 ± 2.45              | NS      |
|                          | % Change | -18.0 ± 8.1 <sup>a,b</sup> | -19.2 ± 6.4 <sup>b</sup>   | -11.2 ± 8.0 <sup>a</sup> | <0.05   |
| Trunk fat as % total fat | Baseline | 51.4 ± 4.8                 | 52.5 ± 4.0                 | 54.9 ± 3.3               | NS      |
|                          | End      | 47.4 ± 5.75 <sup>a</sup>   | 47.7 ± 4.28 <sup>a,b</sup> | 52.5 ± 2.72 <sup>b</sup> | <0.05   |
|                          | % Change | -7.7 ± 6.6                 | -9.0 ± 6.6                 | -4.2 ± 4.8               | NS      |
| Fat (kg)                 | Baseline | 20.0 ± 3.8                 | 20.3 ± 3.8                 | 19.5 ± 2.2               | NS      |
|                          | End      | 14.7 ± 3.7                 | 14.6 ± 3.1                 | 15.4 ± 1.5               | NS      |
|                          | % Change | -26.8 ± 7.6 <sup>a,b</sup> | -28.3 ± 6.4 <sup>a</sup>   | -20.1 ± 8.7 <sup>b</sup> | 0.033   |
| Fat-Free Mass (kg)       | Baseline | 63.7 ± 6.1                 | 64.0 ± 7.3                 | 60.9 ± 6.2               | NS      |
|                          | End      | 60.3 ± 5.6                 | 60.5 ± 6.4                 | 56.8 ± 6.5               | NS      |
|                          | %Change  | -5.3 ± 2.8                 | -5.3 ± 2.5                 | -6.9 ± 2.5               | NS      |
| TC (mg/dl)               | Baseline | 191 ± 34                   | 205 ± 35                   | 194 ± 24                 | NS      |
|                          | End      | 186 ± 26                   | 194 ± 30                   | 194 ± 43                 | NS      |
|                          | % Change | -1.3 ± 12.7                | -4.6 ± 11.6                | 0.25 ± 14.8              | NS      |

|                       |          |                            |                          |                            |         |
|-----------------------|----------|----------------------------|--------------------------|----------------------------|---------|
| TG (mg/dl)            | Baseline | 115 ± 59 <sup>a</sup>      | 171 ± 53 <sup>b</sup>    | 245 ± 83 <sup>b</sup>      | <0.0001 |
|                       | End      | 80 ± 29 <sup>a</sup>       | 105 ± 30 <sup>b</sup>    | 133 ± 45 <sup>b</sup>      | 0.0003  |
|                       | % Change | -22 ± 28.8                 | -36 ± 17.5               | -42 ± 27.8                 | NS      |
| LDL-C (mg/dl)         | Baseline | 123 ± 30                   | 134 ± 31                 | 112 ± 28                   | NS      |
|                       | End      | 119 ± 24                   | 126 ± 25                 | 128 ± 35                   | NS      |
|                       | % Change | -0.5 ± 21.1 <sup>a,b</sup> | -3.6 ± 15.1 <sup>a</sup> | 18.8 ± 40.3 <sup>b</sup>   | NS      |
| HDL-C (mg/dl)         | Baseline | 45 ± 6 <sup>a</sup>        | 37 ± 8 <sup>b</sup>      | 33 ± 6 <sup>b</sup>        | <.0001  |
|                       | End      | 51 ± 9 <sup>a</sup>        | 47 ± 9 <sup>a,b</sup>    | 40 ± 9 <sup>b</sup>        | 0.011   |
|                       | % Change | 13.9 ± 13.6 <sup>a</sup>   | 26.5 ± 16.2 <sup>b</sup> | 22.4 ± 20.1 <sup>a,b</sup> | 0.009   |
| LDL particle size (Å) | Baseline | 265.8 ± 7.0 <sup>a</sup>   | 254.6 ± 6.3 <sup>b</sup> | 247.7 ± 2.2 <sup>c</sup>   | <.0001  |
|                       | End      | 269.7 ± 5.3 <sup>a</sup>   | 265.5 ± 5.0 <sup>b</sup> | 250.8 ± 2.9 <sup>c</sup>   | 0.0001  |
|                       | % Change | 1.5 ± 2.6 <sup>a</sup>     | 4.3 ± 2.5 <sup>b</sup>   | 1.3 ± 1.5 <sup>a</sup>     | <0.0001 |
| Glucose (mg/dl)       | Baseline | 95 ± 6                     | 95 ± 6                   | 96 ± 7                     | NS      |
|                       | End      | 91 ± 5                     | 91 ± 6                   | 91 ± 3                     | NS      |
|                       | % Change | -3.8 ± 6.5                 | -3.9 ± 5.0               | -4.9 ± 6.0                 | NS      |
| Insulin (μU/ml)       | Baseline | 7.20 ± 5.16                | 8.56 ± 5.47              | 9.21 ± 4.22                | NS      |
|                       | End      | 5.3 ± 1.7                  | 5.8 ± 2.5                | 6.4 ± 3.7                  | NS      |
|                       | % Change | -12.2 ± 32.5               | -21.9 ± 41.1             | -25.7 ± 30.3               | NS      |
| HOMA-IR               | Baseline | 1.70 ± 1.35                | 1.99 ± 1.28              | 2.16 ± 0.97                | NS      |
|                       | End      | 1.2 ± 0.4                  | 1.3 ± 0.6                | 1.4 ± 0.8                  | NS      |
|                       | % Change | -14.9 ± 33.3               | -24.8 ± 39.6             | -29.2 ± 29.4               | NS      |
| REE (kcal/day)        | Baseline | 1621 ± 235                 | 1657 ± 290               | 1592 ± 195                 | NS      |
|                       | End      | 1518 ± 226                 | 1492 ± 210*              | 1502 ± 208                 | NS      |
|                       | % Change | -5.5 ± 14.2                | -8.5 ± 14.8              | -5.6 ± 6.6                 | NS      |
| REE/FFM (kcal/day/kg) | Baseline | 25.5 ± 3.4                 | 25.8 ± 3.0               | 26.1 ± 2.2                 | NS      |
|                       | End      | 25.3 ± 3.7                 | 24.7 ± 2.9               | 26.5 ± 2.0                 | NS      |
|                       | % Change | -0.24 ± 14.0               | -3.3 ± 15.3              | 1.5 ± 6.7                  | NS      |

|                             |          |                           |                           |                             |       |
|-----------------------------|----------|---------------------------|---------------------------|-----------------------------|-------|
| RQ                          | Baseline | 0.84 ± 0.05               | 0.83 ± 0.04               | 0.83 ± 0.03                 | NS    |
|                             | End      | 0.82 ± 0.040 <sup>a</sup> | 0.85 ± 0.049 <sup>b</sup> | 0.83 ± 0.044 <sup>a,b</sup> | NS    |
|                             | % Change | -1.8 ± 5.8 <sup>a</sup>   | 2.6 ± 5.8 <sup>b</sup>    | 0.4 ± 5.3 <sup>a,b</sup>    | 0.02  |
| % energy lipid              | Baseline | 55.7 ± 16.3               | 58.8 ± 12.5               | 59.5 ± 9.8                  | NS    |
|                             | End      | 61.4 ± 13.6               | 51.8 ± 16.6               | 58.5 ± 14.9                 | NS    |
|                             | % Change | 17.5 ± 40.5 <sup>a</sup>  | -10.1 ± 34.0 <sup>b</sup> | -0.63 ± 23.6 <sup>a,b</sup> | 0.017 |
| % energy CHO                | Baseline | 44.3 ± 16.3               | 41.2 ± 12.5               | 40.5 ± 9.8                  | NS    |
|                             | End      | 38.6 ± 13.6               | 48.3 ± 16.6               | 41.5 ± 14.9                 | NS    |
|                             | % Change | 1.4 ± 5.8                 | 25.4 ± 47.8               | 5.4 ± 42.1                  | NS    |
| Energy from lipid oxidation | Baseline | 0.61 ± 0.20               | 0.65 ± 0.16               | 0.63 ± 0.08                 | NS    |
|                             | End      | 0.63 ± 0.19               | 0.52 ± 0.20               | 0.57 ± 0.12                 | NS    |
|                             | % Change | 11.7 ± 45 <sup>a</sup>    | -20.1 ± 27.8 <sup>b</sup> | -7.7 ± 20.2 <sup>a,b</sup>  | 0.005 |
| Energy from CHO oxidation   | Baseline | 0.52 ± 0.20               | 0.50 ± 0.18               | 0.47 ± 0.16                 | NS    |
|                             | End      | 0.42 ± 0.16               | 0.51 ± 0.18               | 0.46 ± 0.21                 | NS    |
|                             | % Change | -5.4 ± 5.1                | 18.3 ± -0.37              | -0.37 ± 43.9                | NS    |

Values given are means ± standard deviations. Statistical comparisons were performed by ANOVA and post-hoc Tukey's test. Statistical analysis of triglyceride data was performed with log-transformed data. Values not sharing the same letter (a, b or c) are significantly different. \* An asterisk signifies p<0.05 relative to baseline. To convert cholesterol and triglyceride concentrations to SI units (mmol/L), multiply by 0.0259 and 0.0113, respectively. BMI: body mass index; HDL-C: high density lipoprotein cholesterol; LDL-C: low density lipoprotein cholesterol; TC: total cholesterol; TG: triacylglycerol; HOMA-IR: homeostasis model assessment of insulin resistance; RQ: respiratory quotient; REE: resting energy expenditure; FFM: fat free mass; NS: not significant.
